# Supplementary material for: The effect of high-fructose corn syrup vs. sucrose on anthropometric and metabolic parameters: A systematic review and meta-analysis
Source: PubMed Central journal article supplement (PMC9551185; doi:10.3389/fnut.2022.1013310), 2022-09-27

Supplementary Figure 1. Funnel plot to assess publication bias.

a) Weight

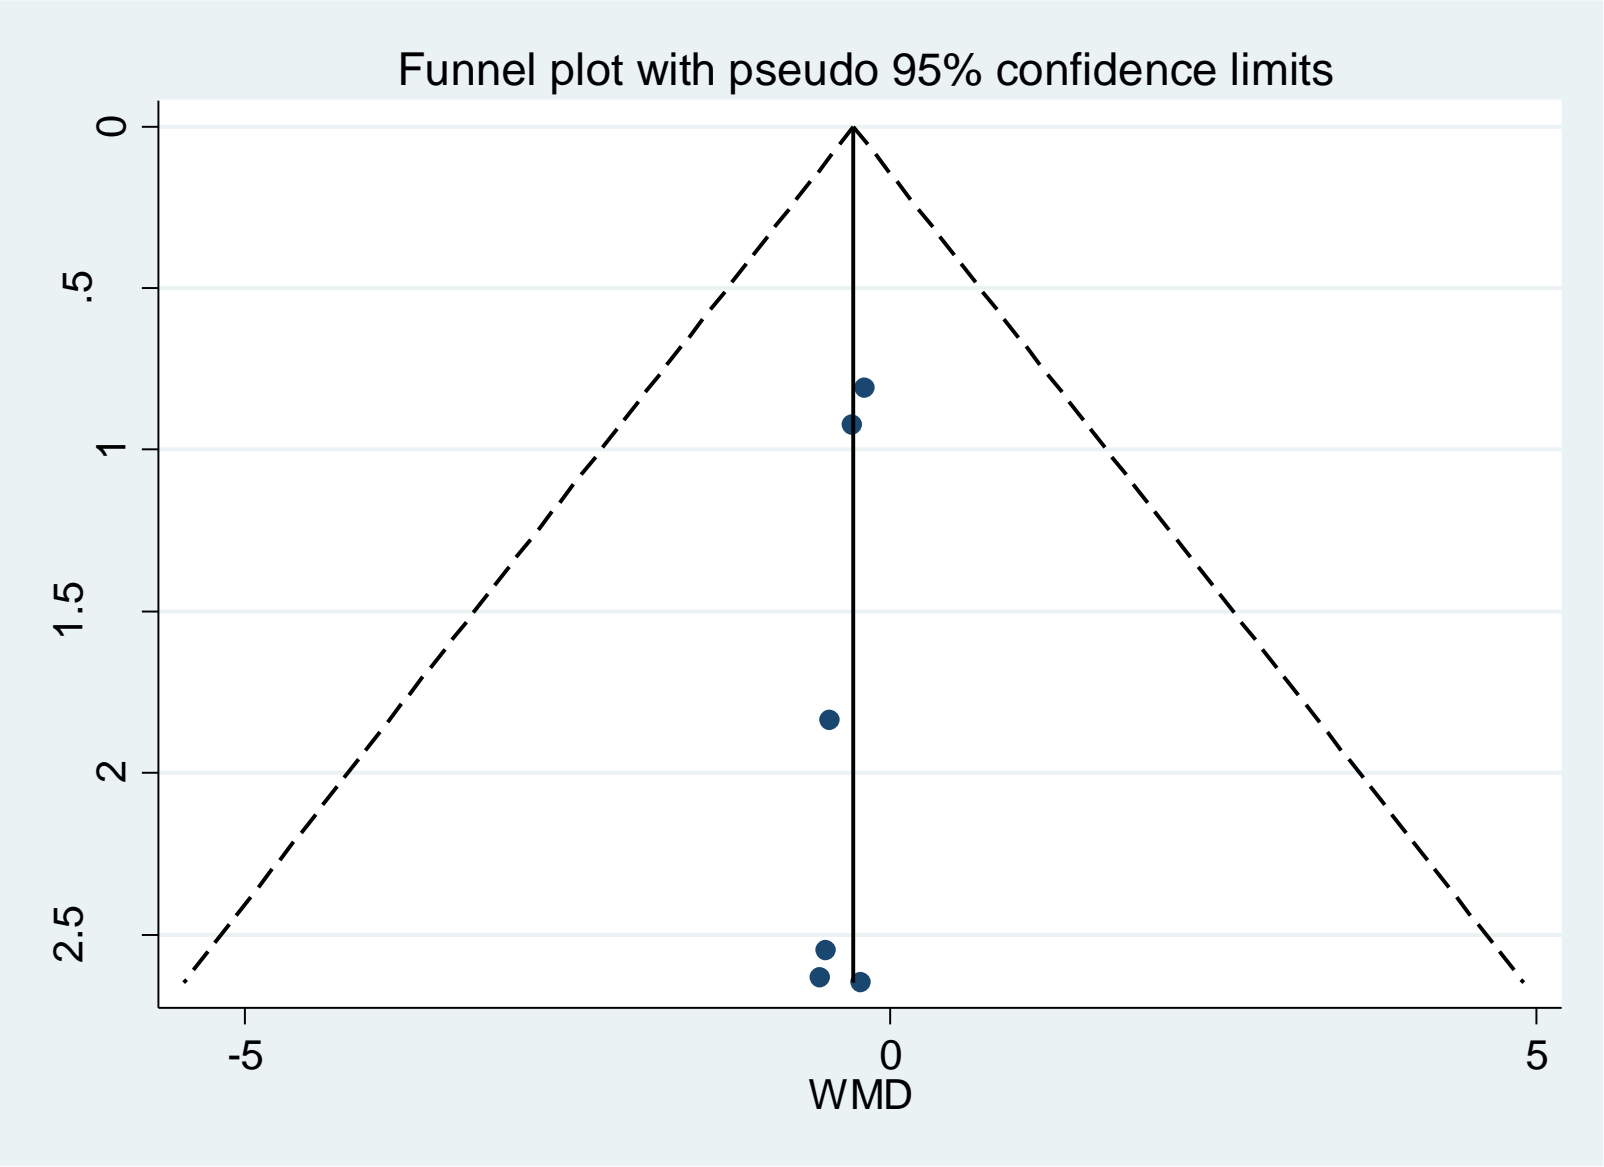

b) Waist circumference

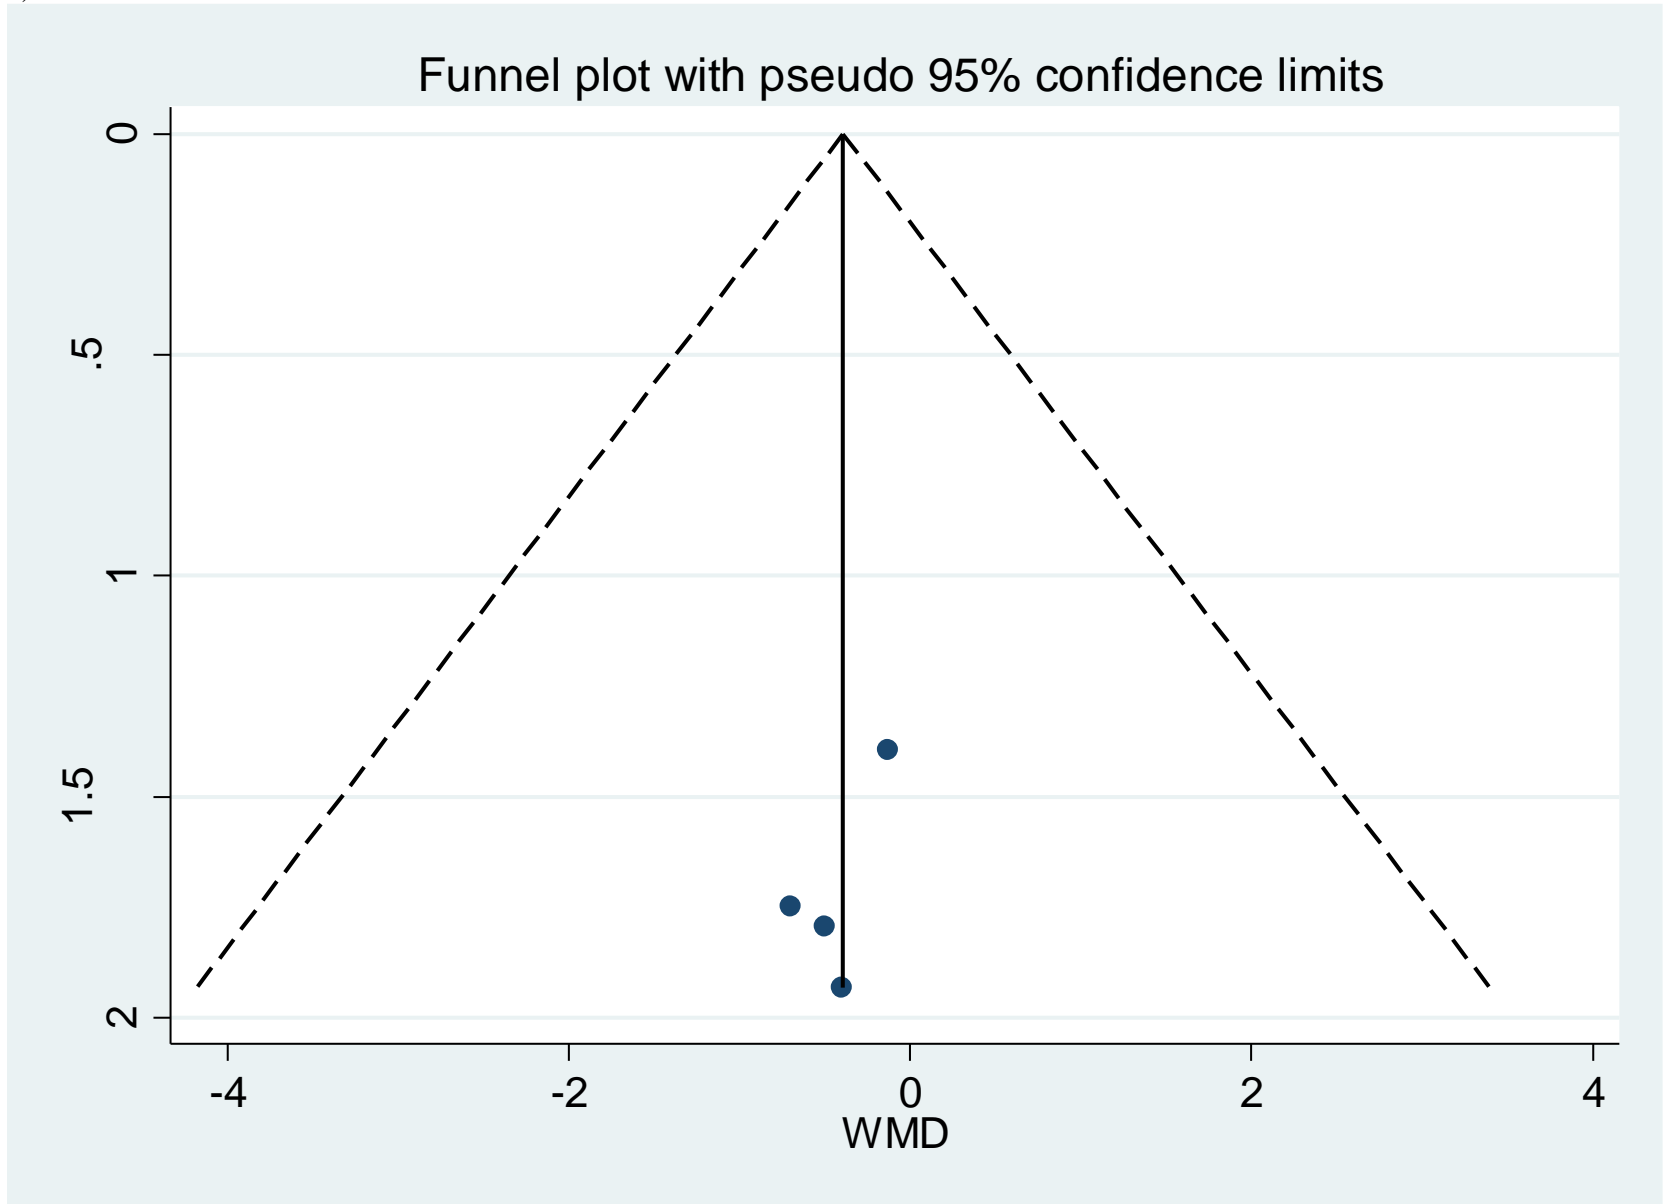

c) Body mass index

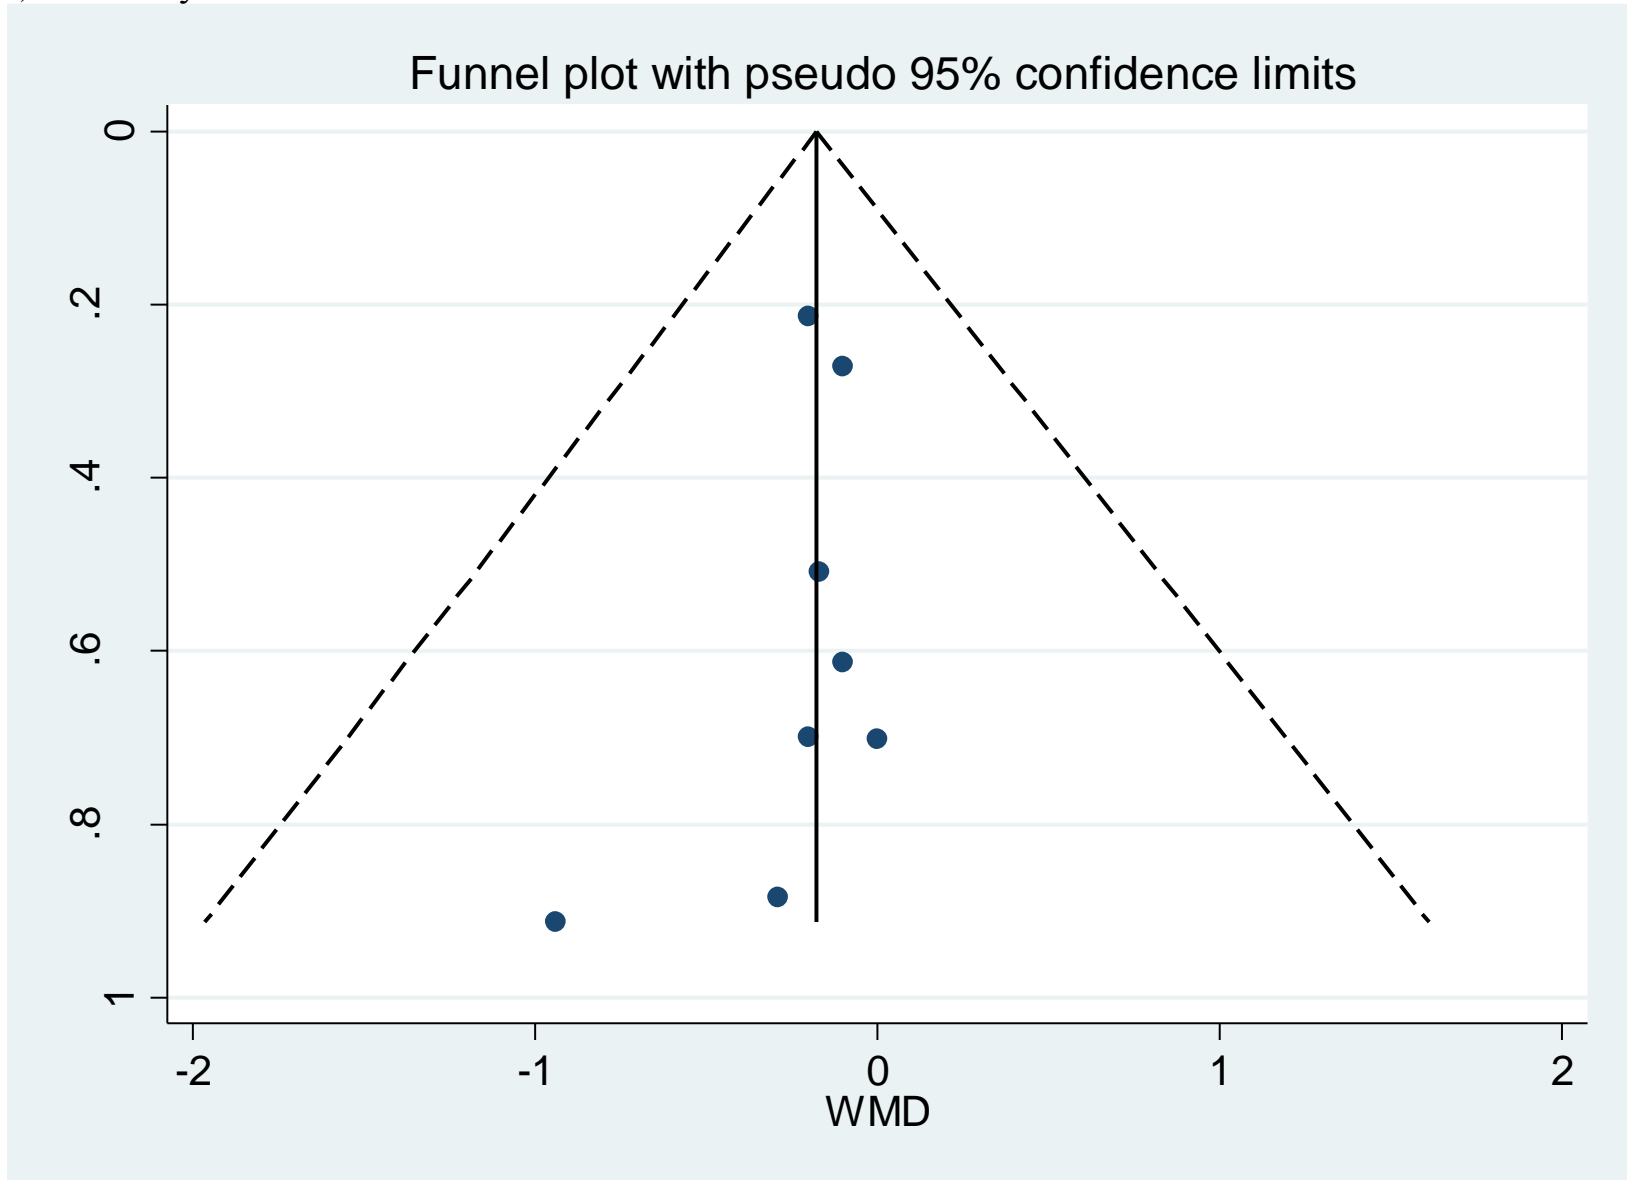

d) Fat mass

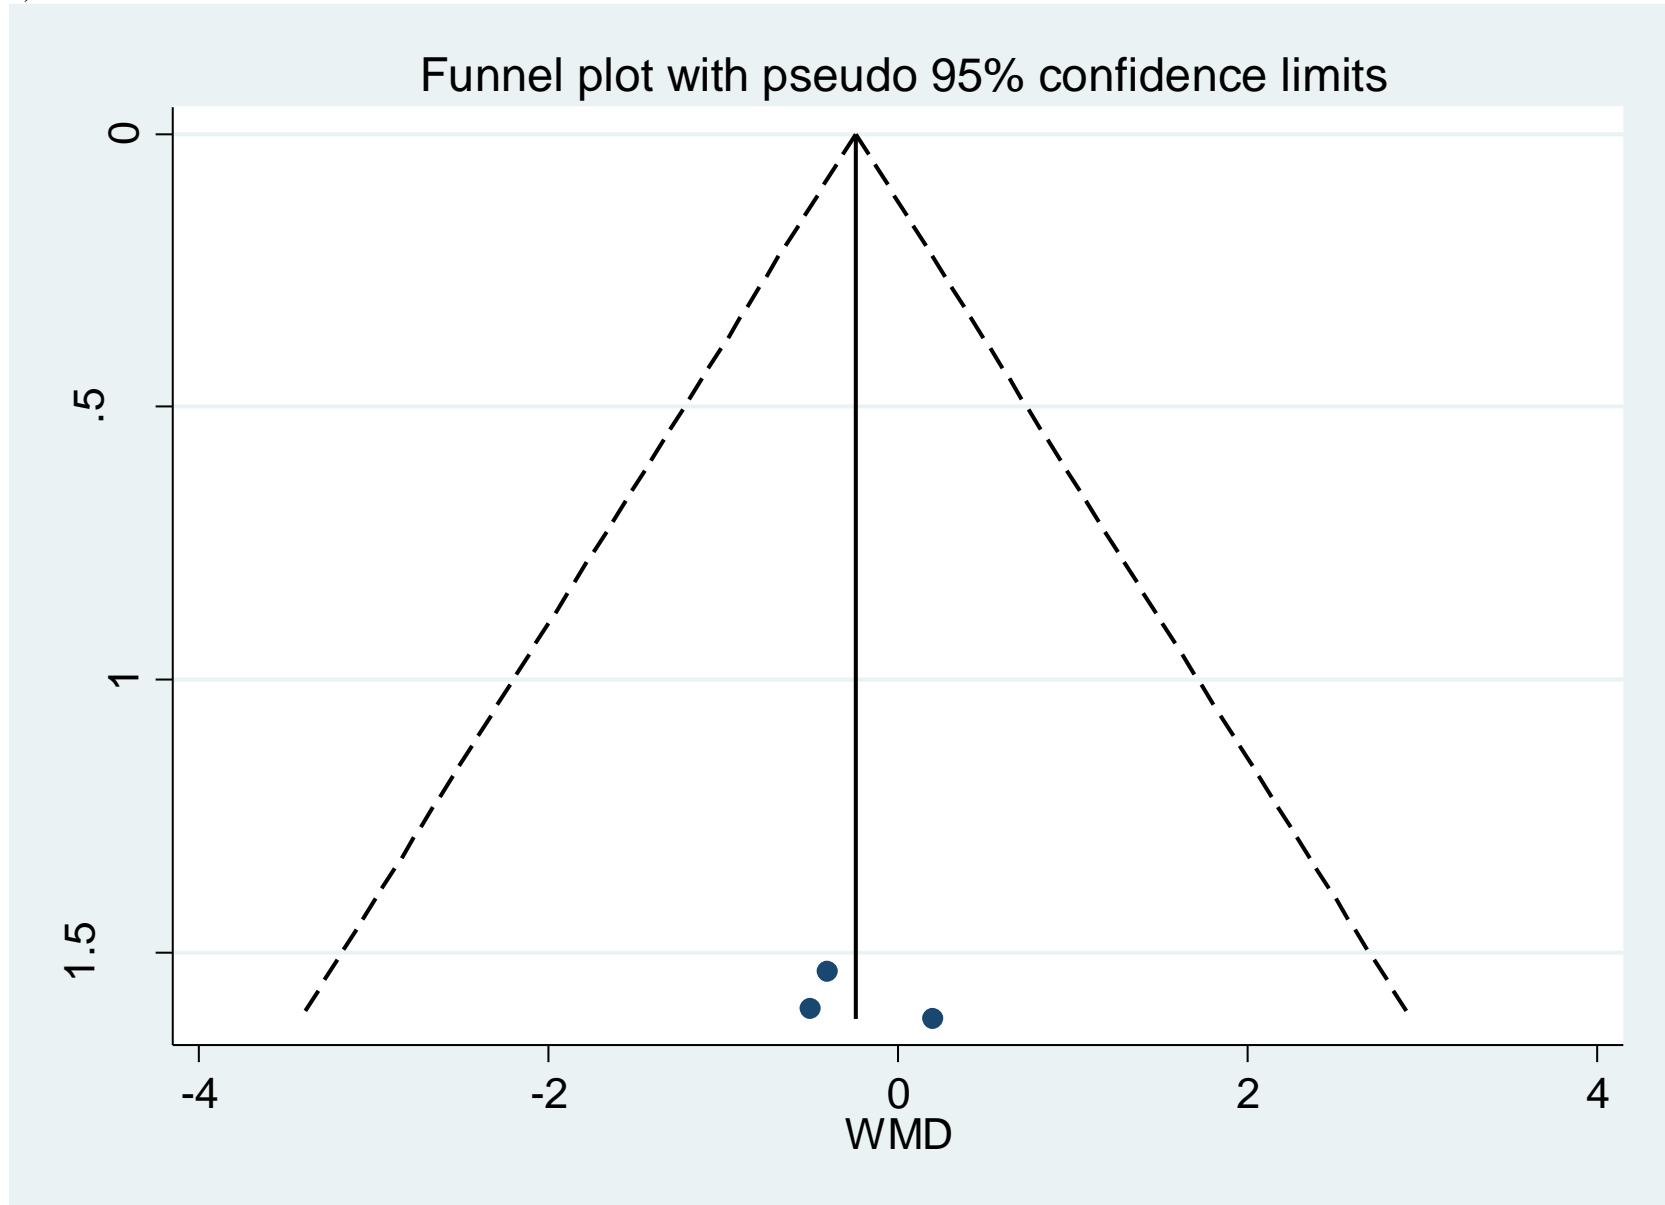

e) Systolic blood pressure

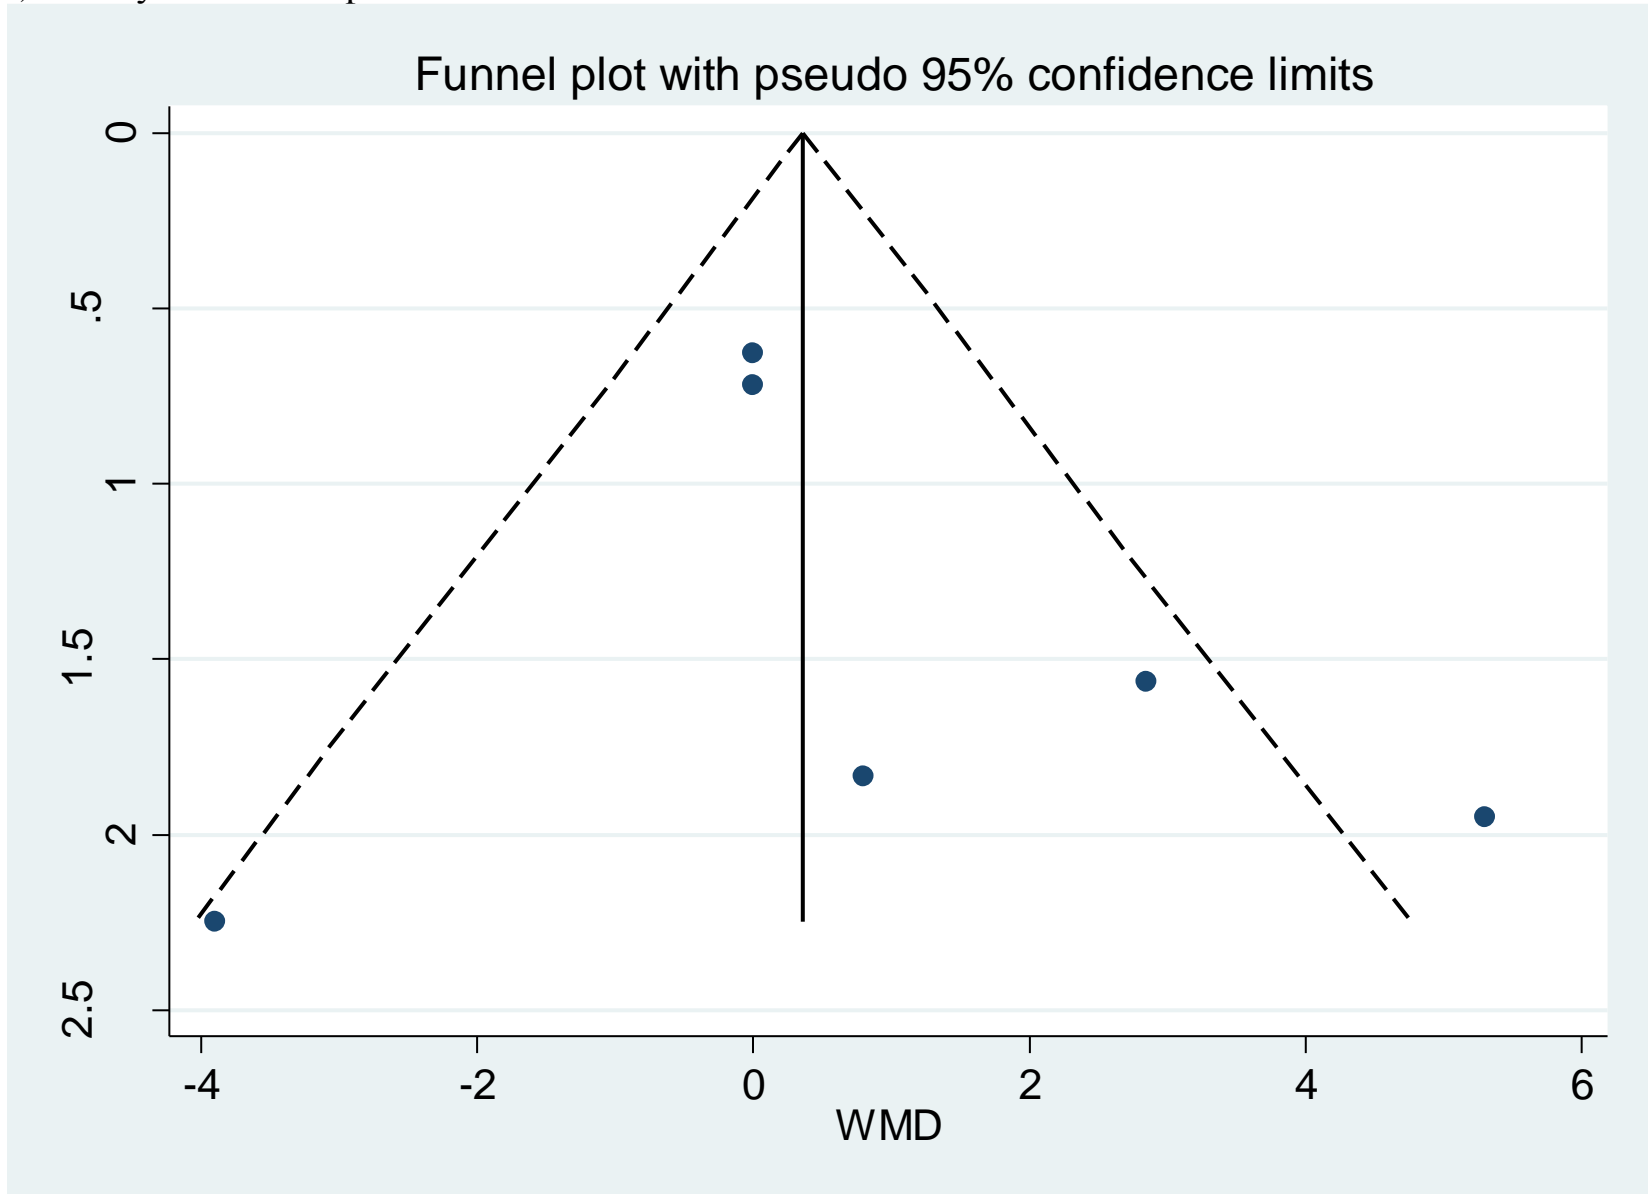

f) Diastolic blood pressure

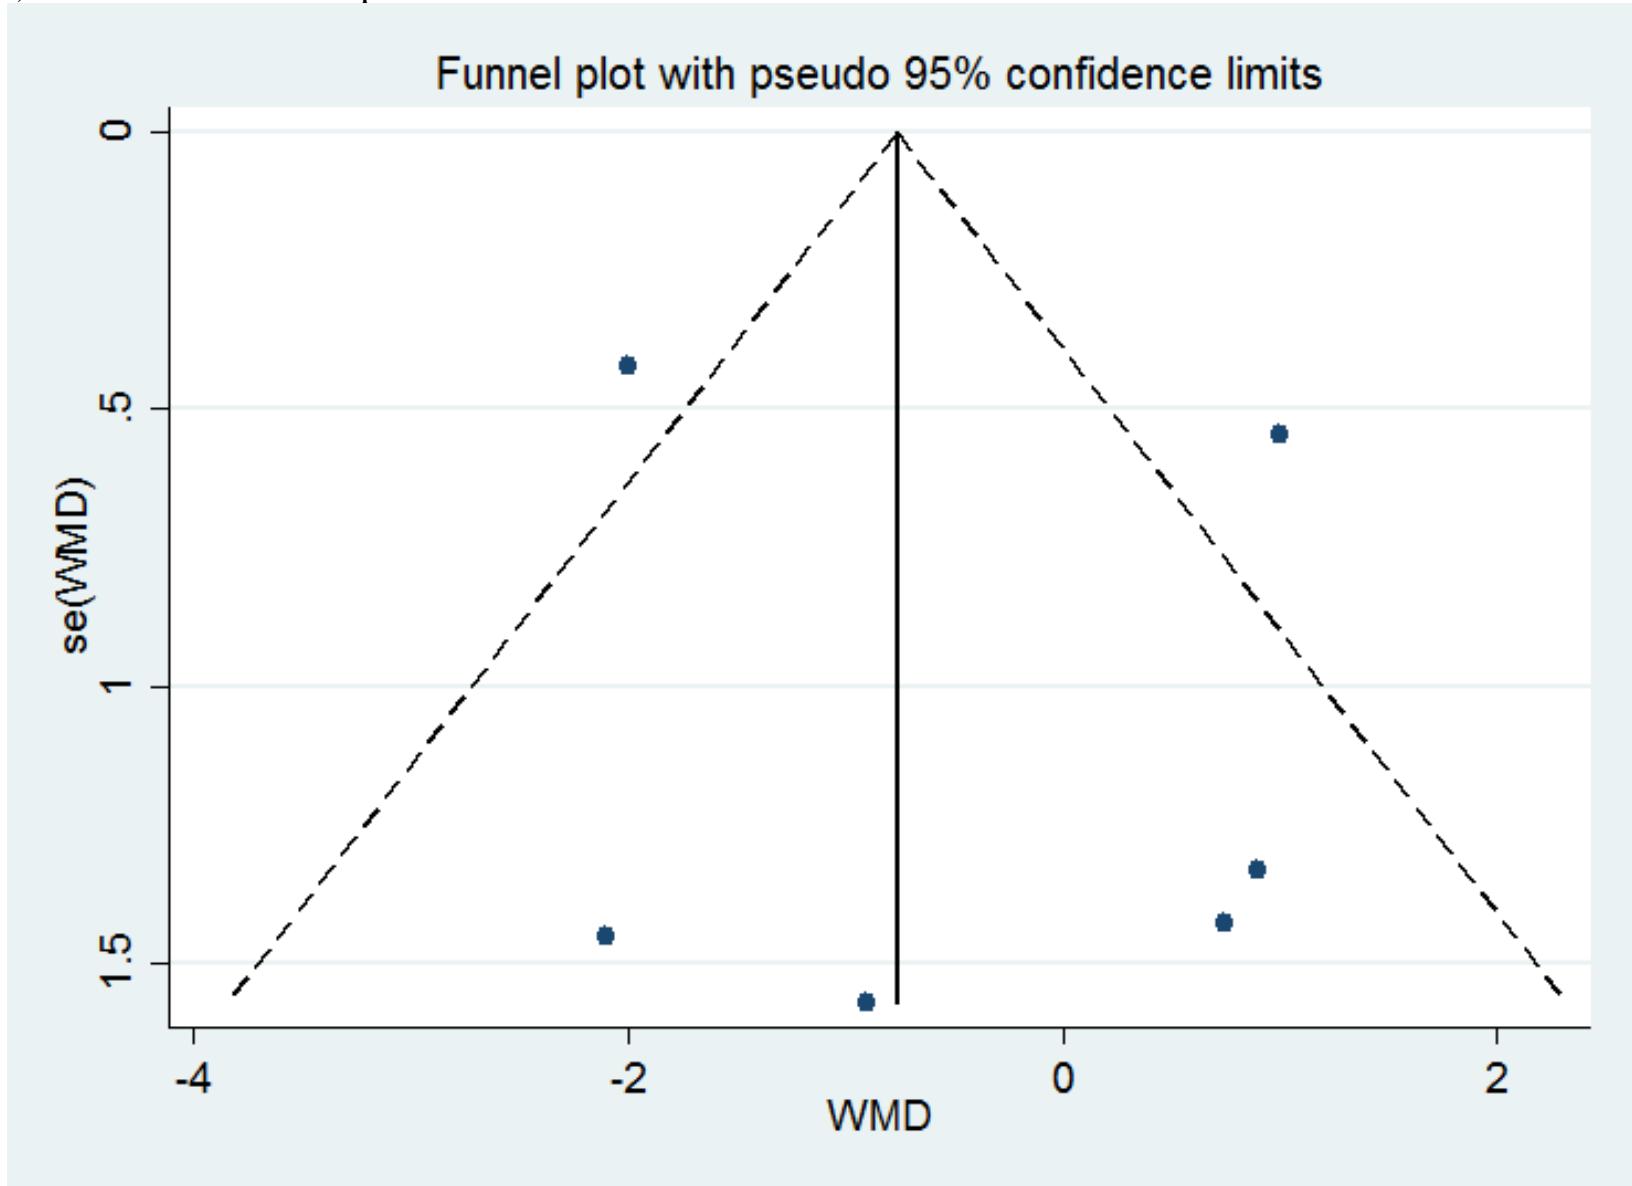

g) Fasting blood glucose

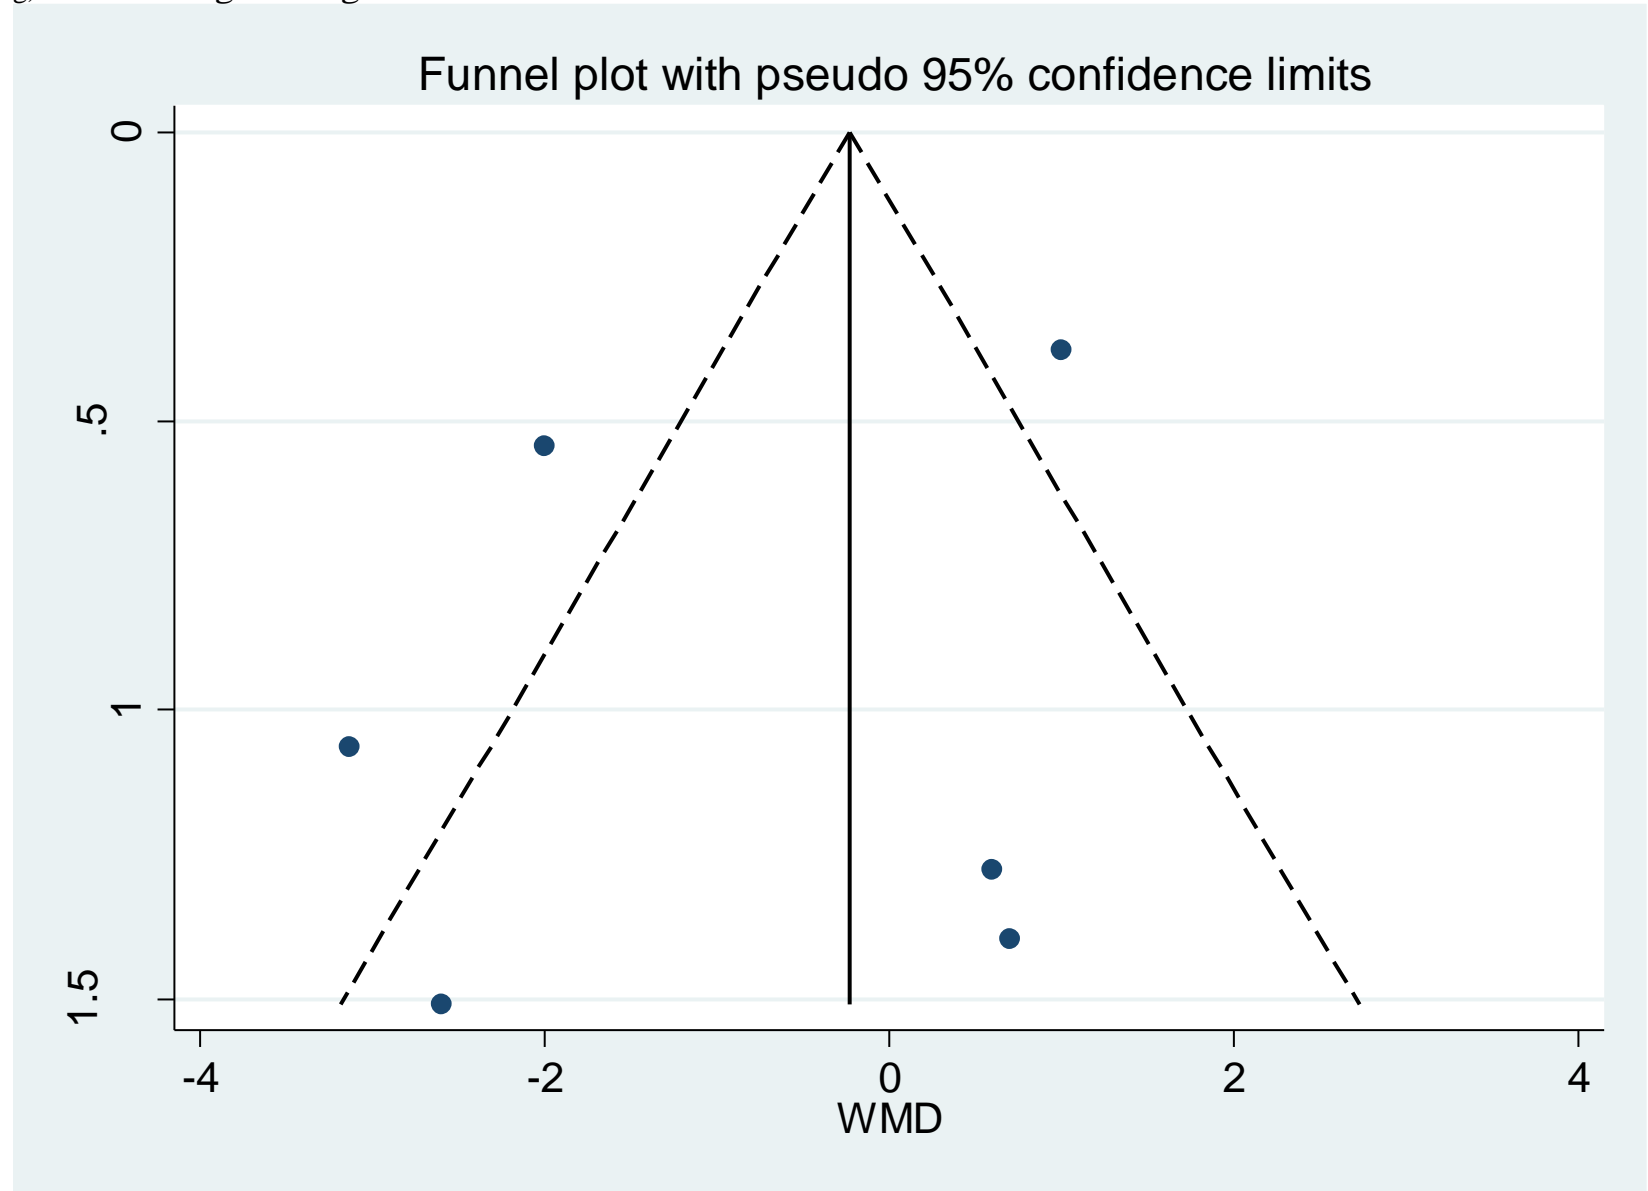

h) Triglyceride

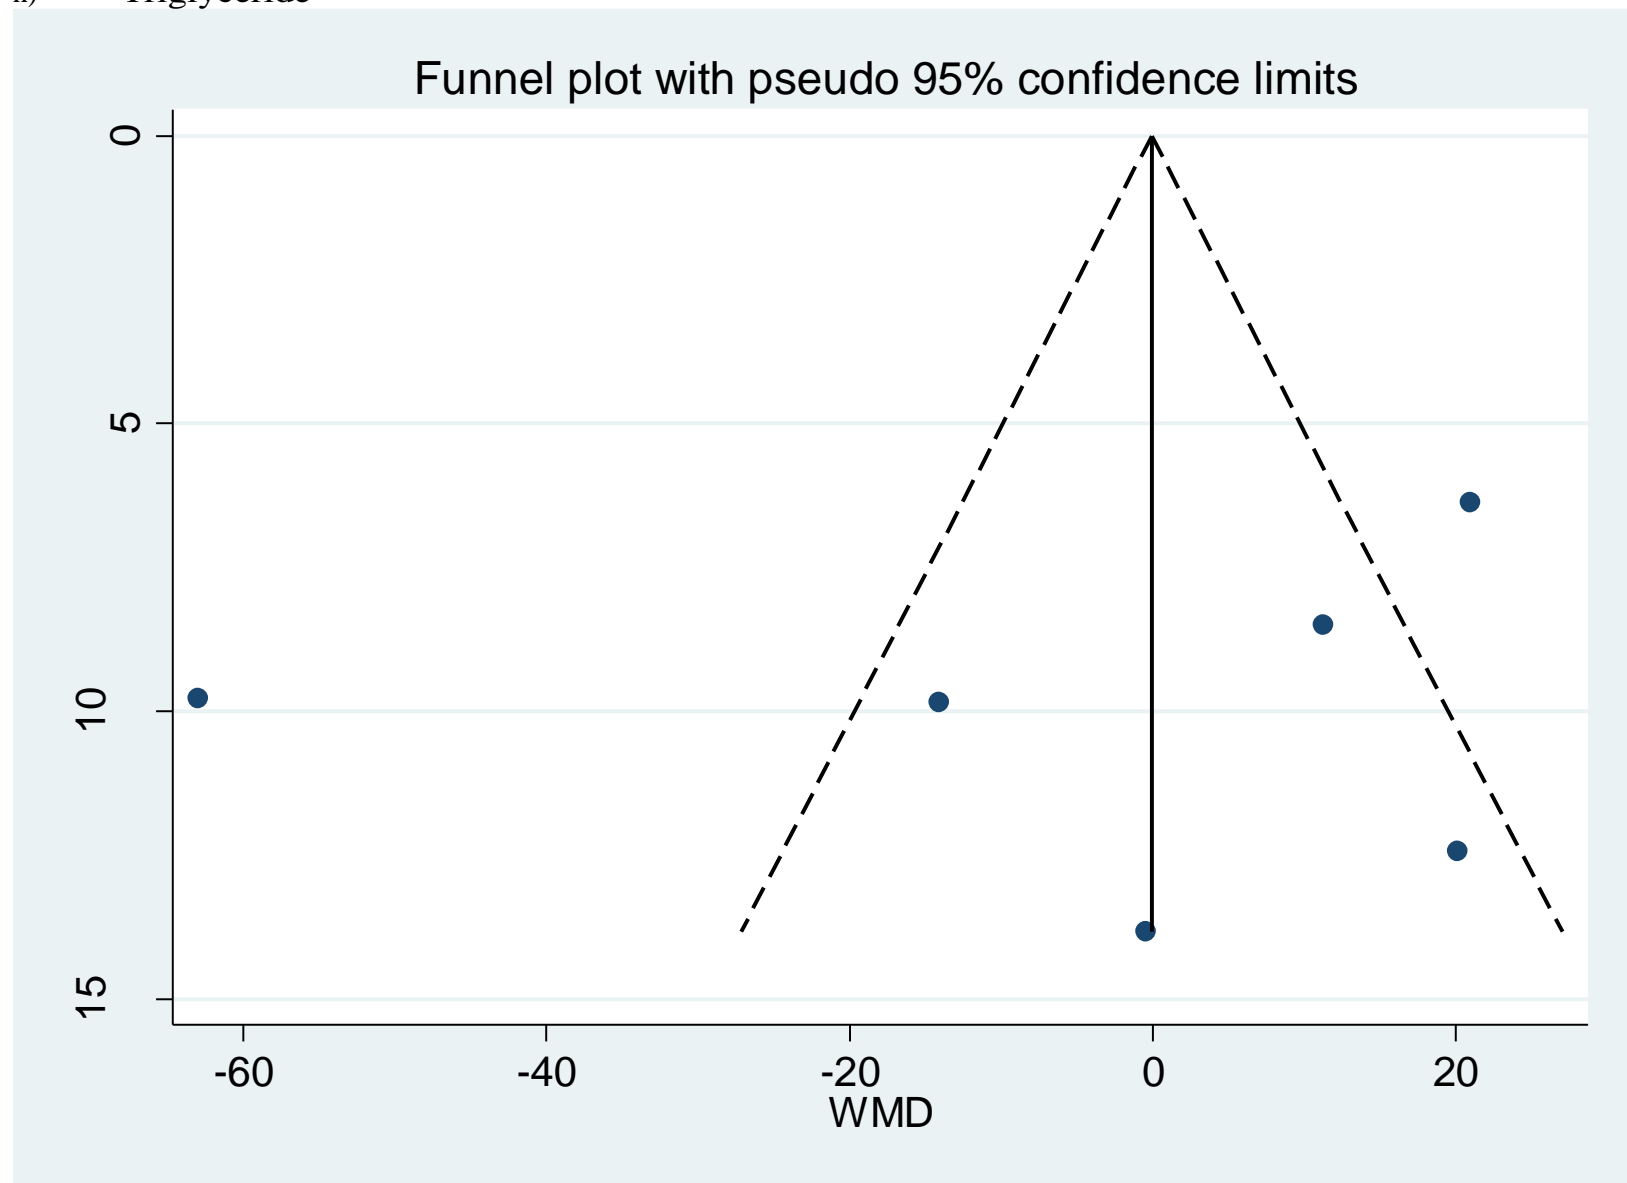



i) Low-density lipoprotein

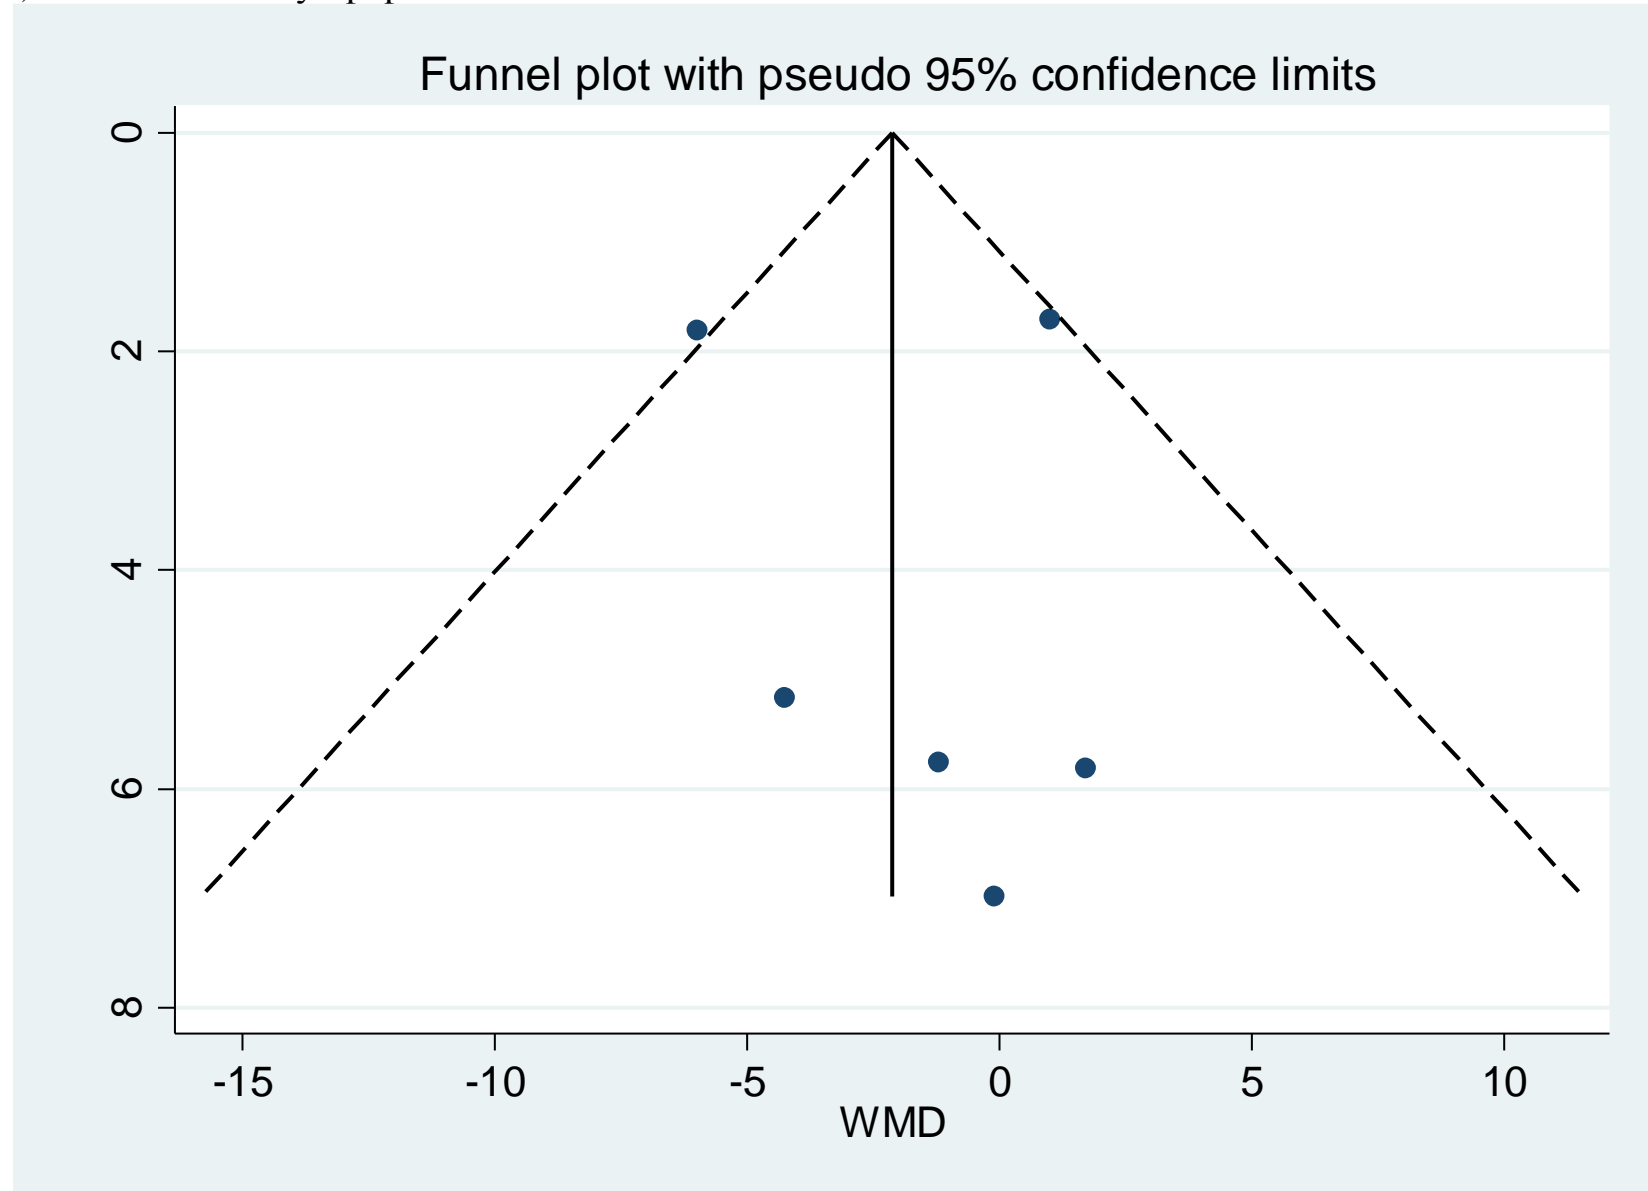

j) High-density lipoprotein

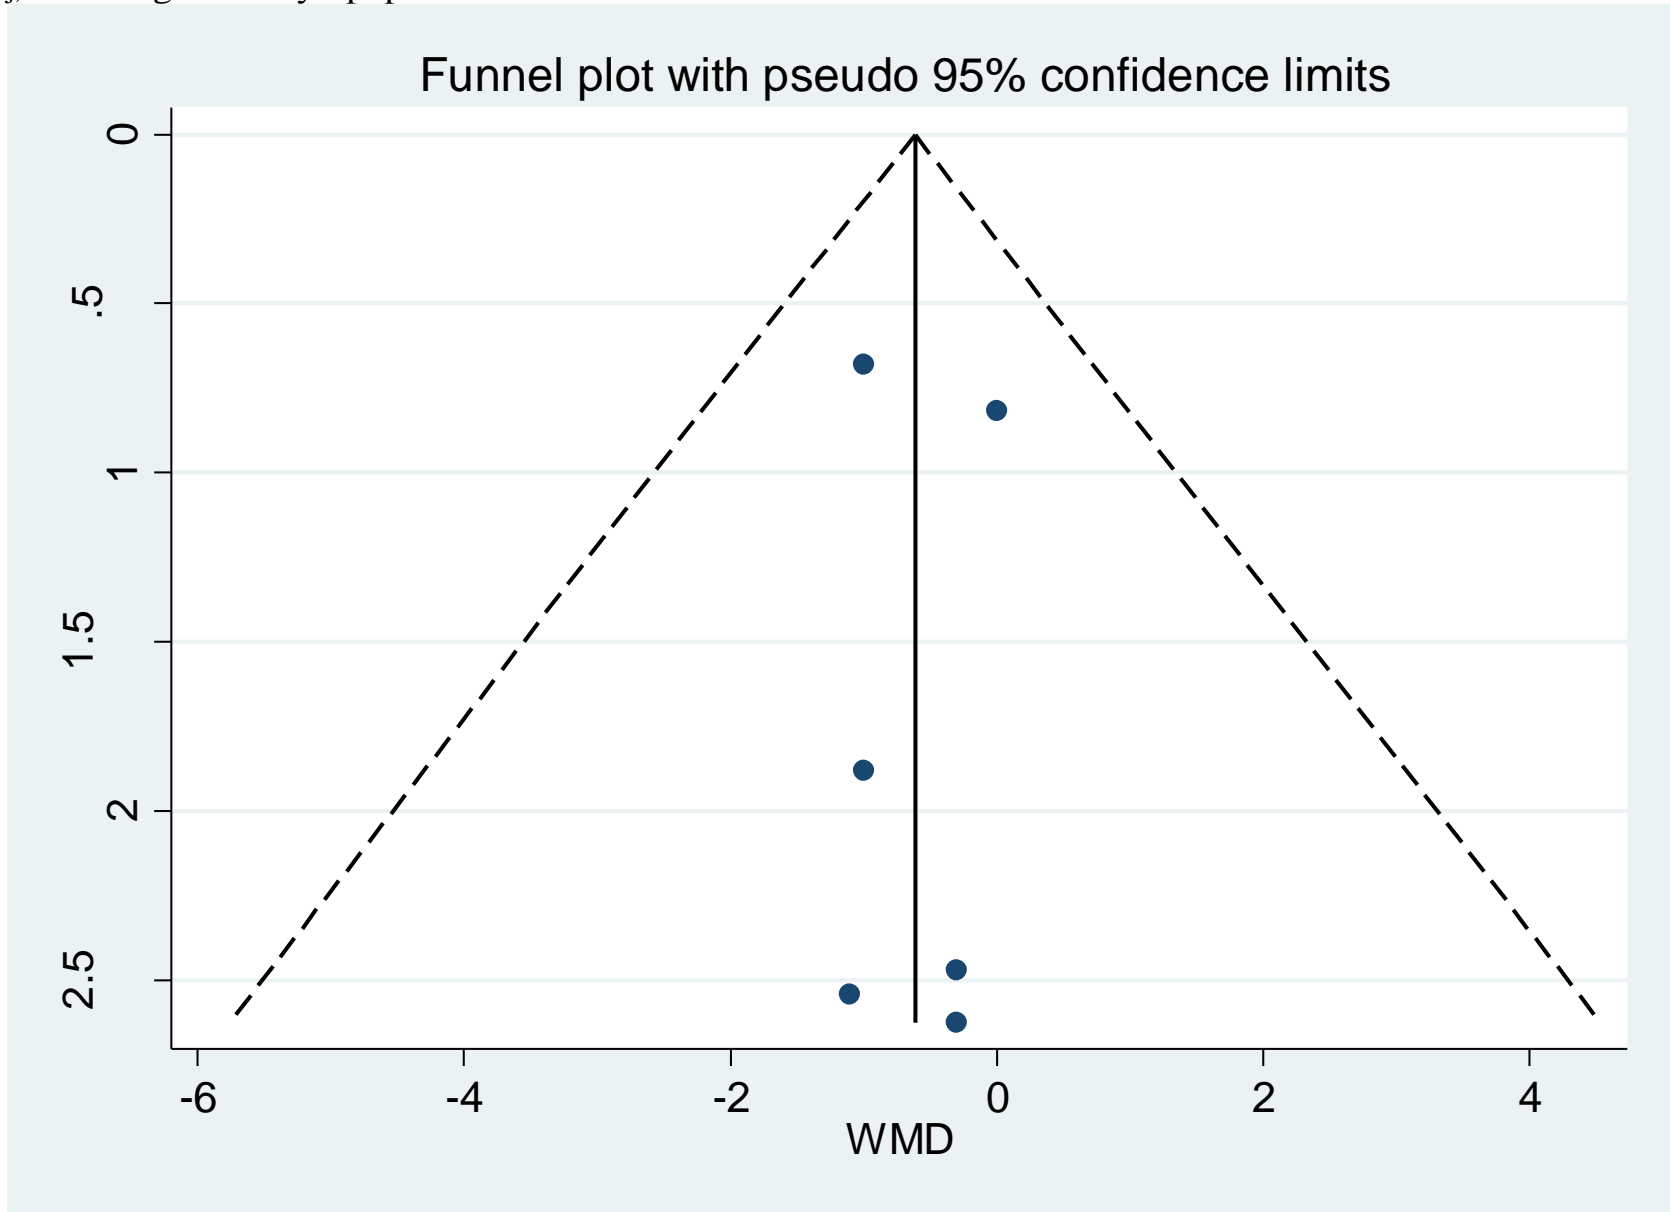

k) Total Cholesterol

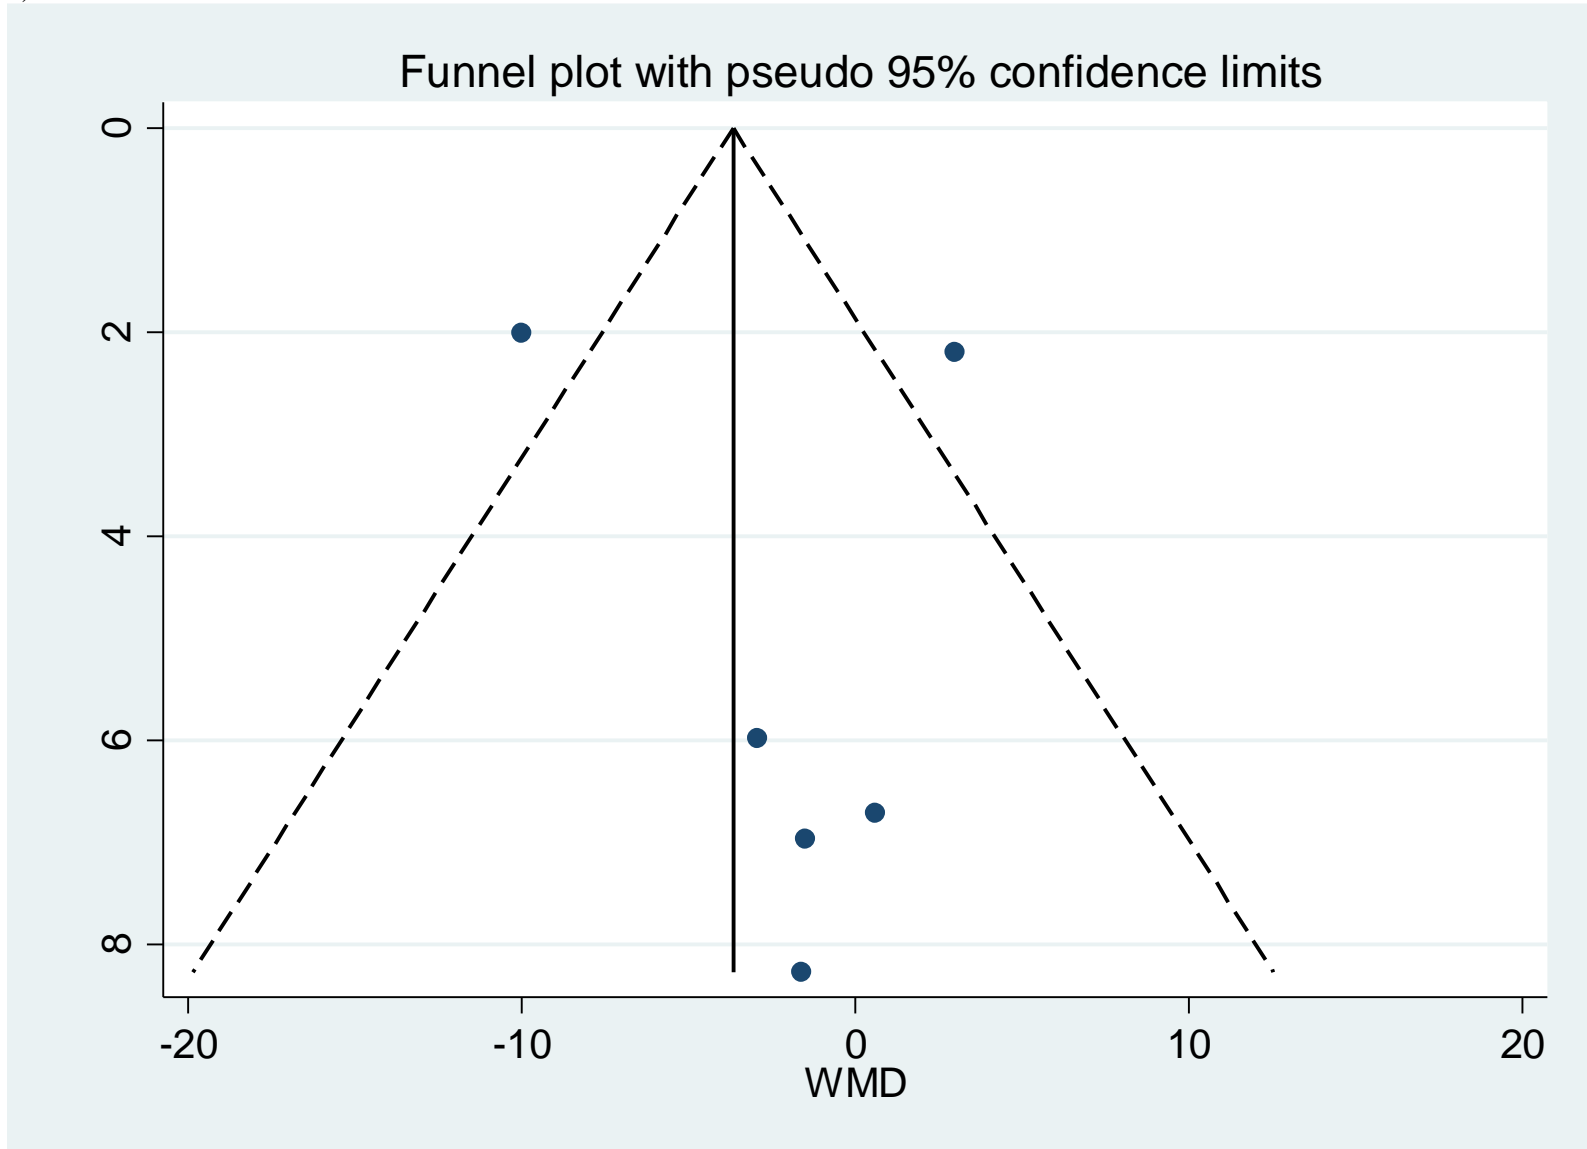

1) C-reactive protein

Funnel plot with pseudo 95% confidence limits

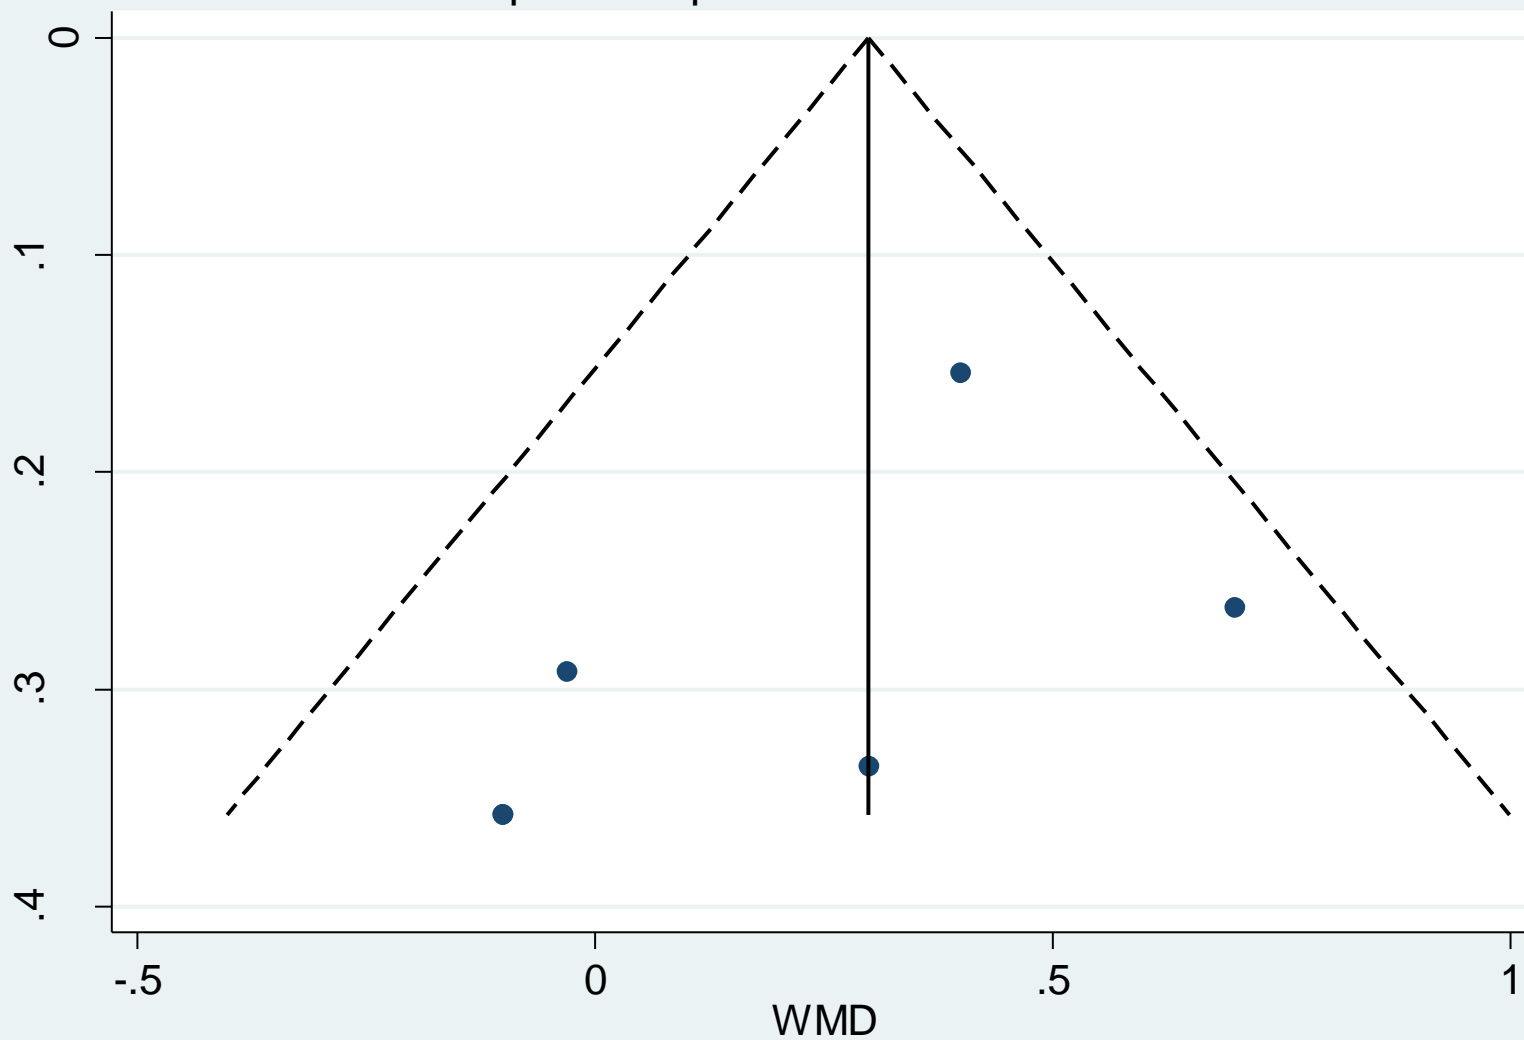

Supplement: Image_1.pdf [file Image_1.pdf]
