# Supplementary material for: The effect of high-fructose corn syrup vs. sucrose on anthropometric and metabolic parameters: A systematic review and meta-analysis
Source: PubMed Central journal article supplement (PMC9551185; doi:10.3389/fnut.2022.1013310), 2022-09-27
Supplement: Table_1.pdf [file Table_1.pdf]

Supplementary table 1. Search strategy.

| PubMed/MEDLINE                                                                                                                                                                                                                                                                                                                                                                                                                                                                                                                                                                                                                                                                                                                                                                                                   | Scopus                                                                                                                                                                                                                                                                                                                                                                                                                                                                                                                                                                                                                         | Cochrane Library                                                                                                                                                                                                                                                                                       | Web of Science                                                                                                                                                                                                                                                                                                     |
|------------------------------------------------------------------------------------------------------------------------------------------------------------------------------------------------------------------------------------------------------------------------------------------------------------------------------------------------------------------------------------------------------------------------------------------------------------------------------------------------------------------------------------------------------------------------------------------------------------------------------------------------------------------------------------------------------------------------------------------------------------------------------------------------------------------|--------------------------------------------------------------------------------------------------------------------------------------------------------------------------------------------------------------------------------------------------------------------------------------------------------------------------------------------------------------------------------------------------------------------------------------------------------------------------------------------------------------------------------------------------------------------------------------------------------------------------------|--------------------------------------------------------------------------------------------------------------------------------------------------------------------------------------------------------------------------------------------------------------------------------------------------------|--------------------------------------------------------------------------------------------------------------------------------------------------------------------------------------------------------------------------------------------------------------------------------------------------------------------|
| ("Clinical Trials as Topic"[Mesh] OR<br>"Cross-Over Studies"[Mesh] OR<br>"Double-Blind Method"[Mesh] OR<br>"Single-Blind Method"[Mesh] OR<br>"Random Allocation"[Mesh] OR<br>RCT[Title/Abstract] OR "Intervention<br>Studies"[Title/Abstract] OR<br>"intervention"[Title/Abstract] OR<br>"controlled trial"[Title/Abstract] OR<br>"randomized"[Title/Abstract] OR<br>"randomised"[Title/Abstract] OR<br>"random"[Title/Abstract] OR<br>"randomly"[Title/Abstract] OR<br>"placebo"[Title/Abstract] OR<br>"assignment"[Title/Abstract]) AND<br>(("High Fructose Corn Syrup 55%"[tiab]<br>OR "HFCS-55"[tiab] OR "High<br>Fructose Corn Syrup"[tiab] OR "High<br>Fructose Corn Syrup"[Mesh]) AND<br>(((Sucrose[Title/Abstract] OR<br>"Sucrose"[Mesh]) OR "Sugar"[tiab])<br>OR "Sugars"[Mesh]) OR<br>"Sugars"[tiab])) | ( ( TITLE-ABS-KEY ( rct ) OR TITLE-ABS-<br>KEY ( "Intervention Studies" ) OR TITLE-ABS-<br>KEY ( intervention ) OR TITLE-ABS-KEY (<br>"controlled trial" ) OR TITLE-ABS-KEY (<br>randomized ) OR TITLE-ABS-KEY ( randomised<br>) OR TITLE-ABS-KEY ( random ) OR TITLE-<br>ABS-KEY ( randomly ) OR TITLE-ABS-KEY (<br>placebo ) OR TITLE-ABS-KEY ( assignment ) ) )<br>AND ( ( TITLE-ABS-KEY ( "High Fructose Corn<br>Syrup 55%" ) OR TITLE-ABS-KEY ( "HFCS-<br>55" ) OR TITLE-ABS-KEY ( "High Fructose<br>Corn Syrup" ) ) ) AND ( ( TITLE-ABS-KEY (<br>sucrose ) OR TITLE-ABS-KEY ( sugar ) OR<br>TITLE-ABS-KEY ( sugars ) ) ) | (RCT OR "Intervention<br>Studies" OR intervention<br>OR "controlled trial" OR<br>randomized OR<br>randomised OR random<br>OR randomly OR placebo<br>OR assignment) AND<br>("High Fructose Corn<br>Syrup 55%" OR "HFCS-<br>55" OR "High Fructose<br>Corn Syrup") AND<br>(Sucrose OR Sugar OR<br>Sugars) | TS=(RCT OR<br>"Intervention Studies" OR<br>intervention OR<br>"controlled trial" OR<br>randomized OR<br>randomised OR random<br>OR randomly OR placebo<br>OR assignment) AND<br>TS=("High Fructose Corn<br>Syrup 55%" OR "HFCS-<br>55" OR "High Fructose<br>Corn Syrup") AND<br>TS=(Sucrose OR Sugar OR<br>Sugars) |
